# Supplementary material for: [Retracted] TRPM7 Upregulate the Activity of SMAD1 through PLC Signaling Way to Promote Osteogenesis of hBMSCs
Source: Hindawi journal article supplement (doi:10.1155/2020/9458983), 2020-01-01
Supplement: f1 [file 9458983.f1.zip]

Archive with 8 entries (8 files):
- Supplementary material A.pdf
- Supplementary material B-a.pdf
- Supplementary material B-b.pdf
- Supplementary material C.pdf
- Supplementary material D.pdf
- Supplementary material description.docx
- Supplementary material E.pdf
- Supplementary material F.pdf
