# Supplementary material for: [Retracted] TRPM7 Upregulate the Activity of SMAD1 through PLC Signaling Way to Promote Osteogenesis of hBMSCs
Source: Hindawi journal article supplement (doi:10.1155/2020/9458983), 2020-01-01
Supplement: f1 [file 9458983.f1.zip › Supplementary material description.docx]

**Supplementary material:** The expression of osteogenic markers induced for 0, 3, 7, and 14 days. (A) The mRNA expression of ALP, COL1A1, Runx2, OPN and OCN in cells induced for 0, 3, 7, and 14 days. (B) (a) The protein expression of ALP, COL1A1, Runx2 protein in cells induced for 0, 3, 7, and 14 days. (b) Relative protein expression levels of TRPM7 protein were quantified and plotted. (C) Analysis of ALP staining in cells induced with osteogenic medium for 0, 3, 7, 14days. (D) Analysis of ALP activity (the unit for p-nitrophenyl: μmol) in cells treated with osteogenic medium for 0, 3, 7, 14days. (E) Staining of ARS in cells induced with osteogenic medium for 0, 3, 7,14 days. (F) ARS quantification by stain extraction and detected the absorbance at 405 nm. Scale: 100μm.**P*< 0.05, ***P*< 0.01, ****P*< 0.0001.
