# Supplementary figures and images for: [Retracted] TRPM7 Upregulate the Activity of SMAD1 through PLC Signaling Way to Promote Osteogenesis of hBMSCs
Source: Hindawi journal article supplement (doi:10.1155/2020/9458983), 2020-01-01

## Supplementary material F

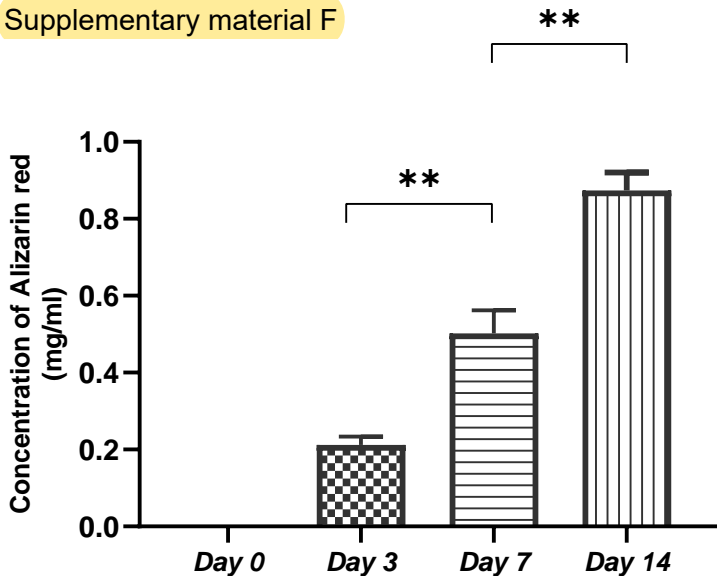

Supplement: f1 [file 9458983.f1.zip]

## Supplementary material D

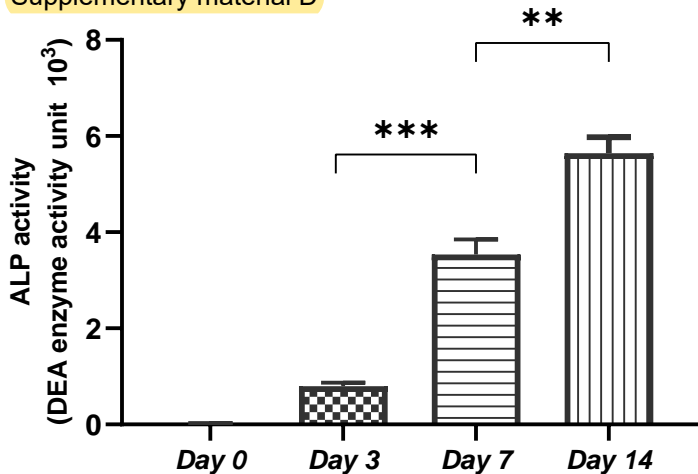

Supplement: f1 [file 9458983.f1.zip]

Supplementary material B-a

**B**

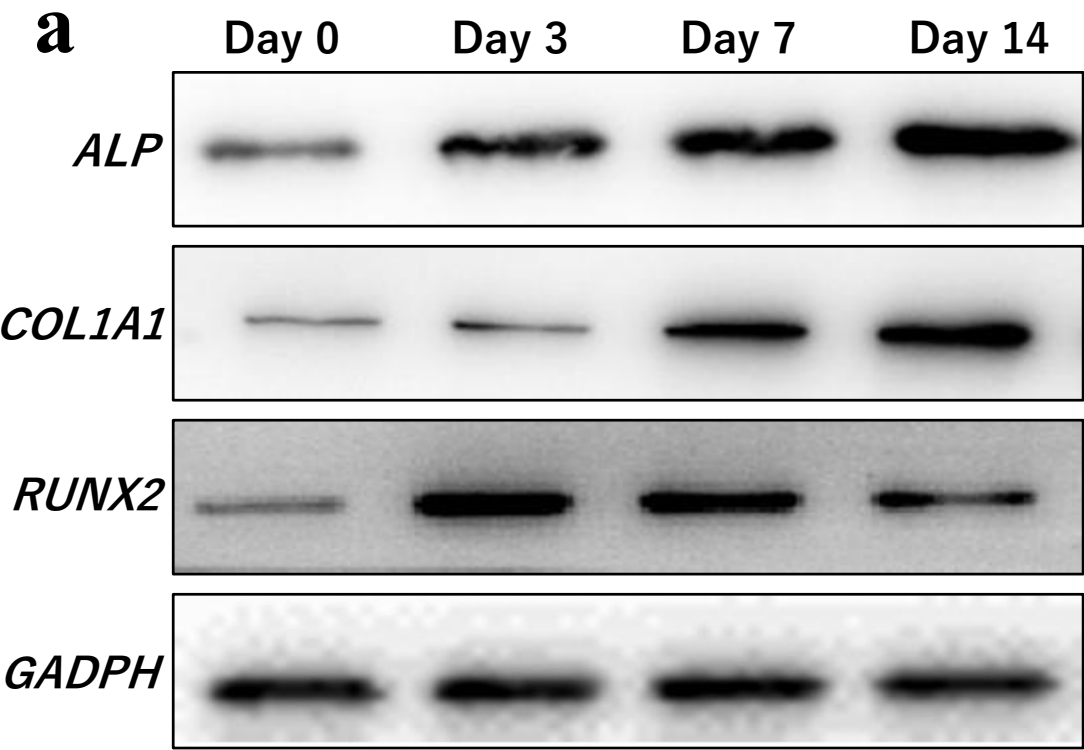

Supplement: f1 [file 9458983.f1.zip]

# Supplementary material A

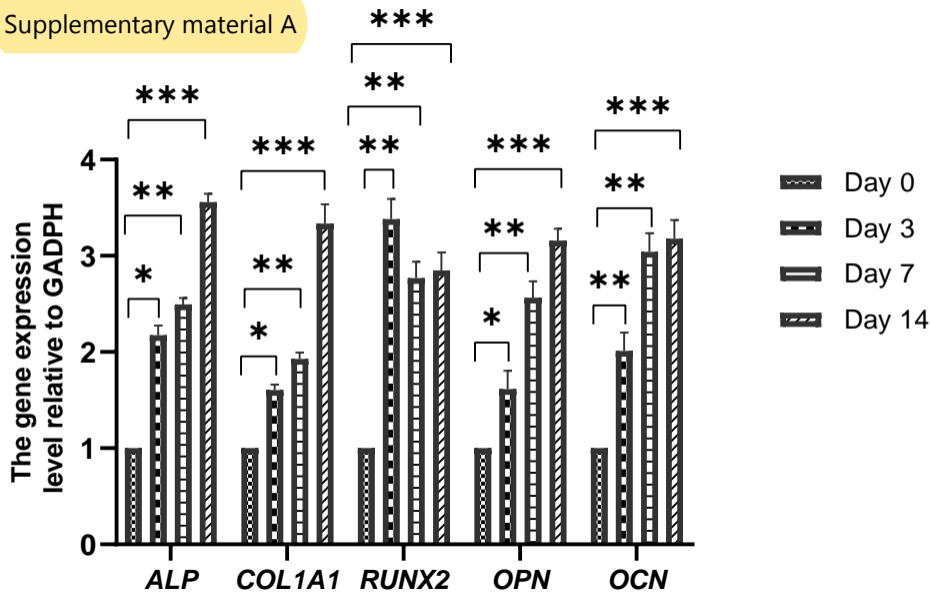

Supplement: f1 [file 9458983.f1.zip › Supplementary material A.pdf]

## Supplementary material B-b

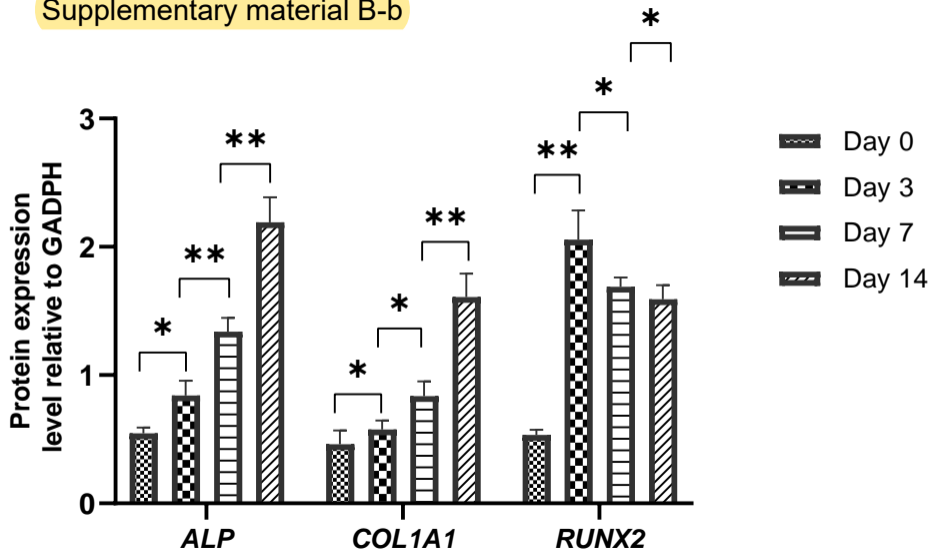

Supplement: f1 [file 9458983.f1.zip › Supplementary material B-b.pdf]

## Supplementary material C

**C**

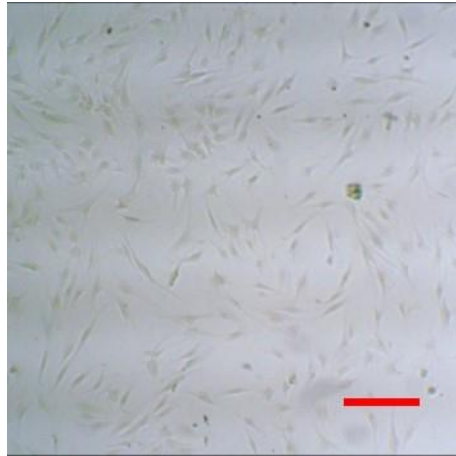

Day 0

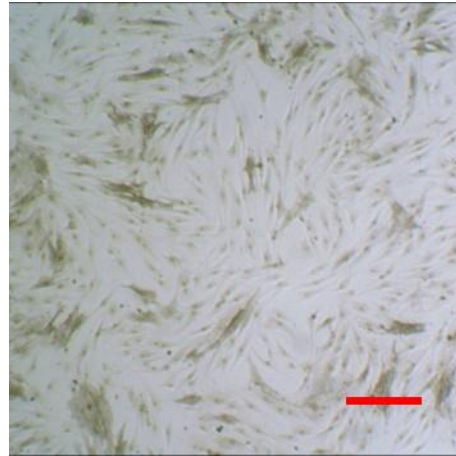

Day 3

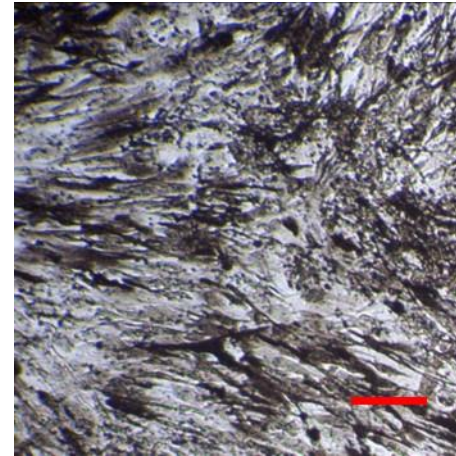

Day 7

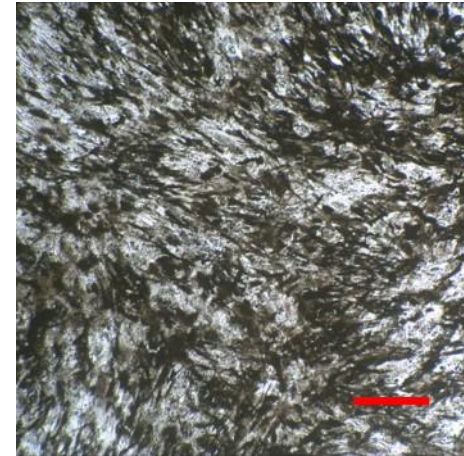

Day 14

Supplement: f1 [file 9458983.f1.zip › Supplementary material C.pdf]

Supplementary material E

E

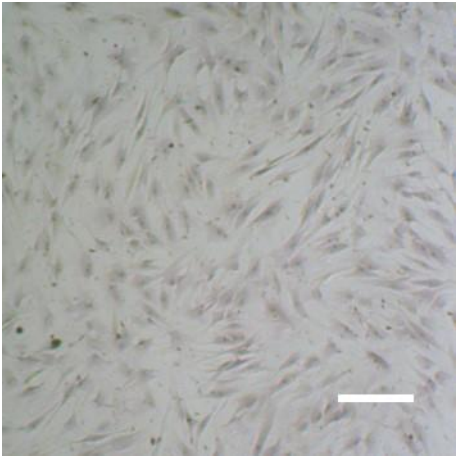

Day 0

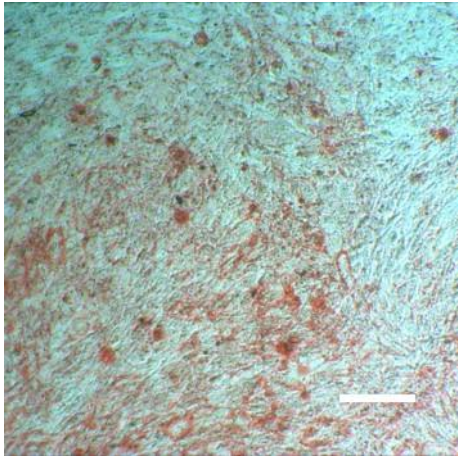

Day 3

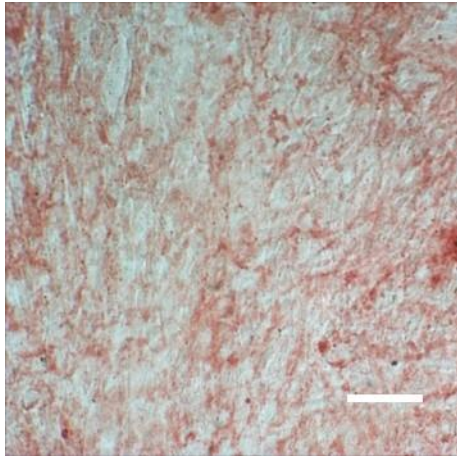

Day 7

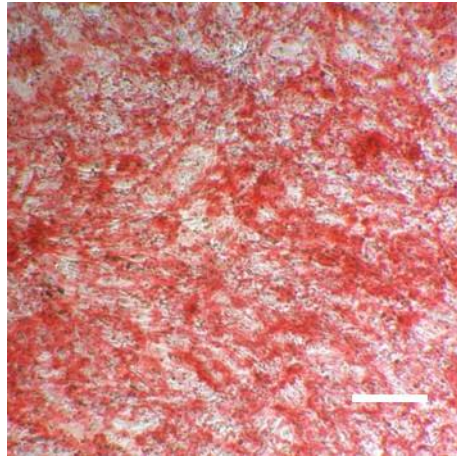

Day 14

Supplement: f1 [file 9458983.f1.zip › Supplementary material E.pdf]
